# Supplementary material for: A fast self-healing multifunctional polyvinyl alcohol nano-organic composite hydrogel as a building block for highly sensitive strain/pressure sensors
Source: Royal Society of Chemistry journal article supplement (doi:10.1039/d1ta05586k), 2021-01-01
Supplement: d1ta05586k1.pdf [file d1ta05586k1.pdf]

## **Supporting Information**

### **Fast self-healing multifunctional polyvinyl alcohol nano-organic composite hydrogel as building blocks for highly sensitive strain/pressure sensors**

**Wenhao Zhao, Dongzhi Zhang\*, Yan Yang, Chen Du, Bao Zhang**

College of Control Science and Engineering, China University of Petroleum (East China), Qingdao 266580, China

\*Corresponding author: Dongzhi Zhang

E-mail address: [dzzhang@upc.edu.cn](mailto:dzzhang@upc.edu.cn)

Tel: +86-532-86982928

Fax: +86-532-86983326

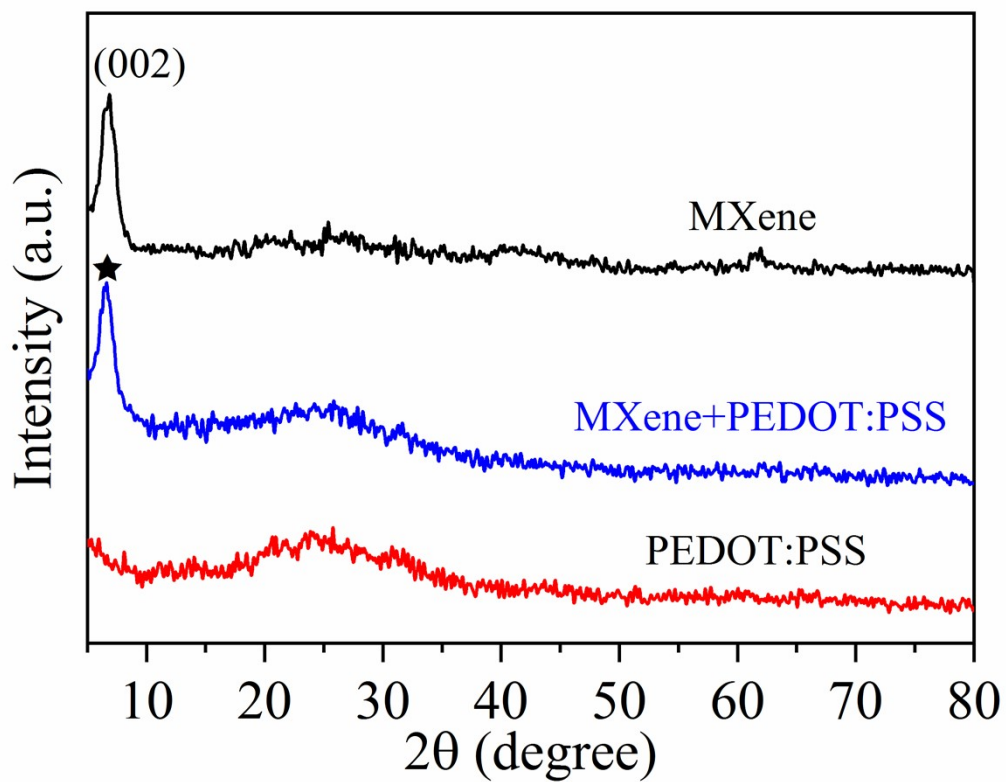

**Fig. S1.** XRD patterns of conductive fillers MXene and PEDOT:PSS.

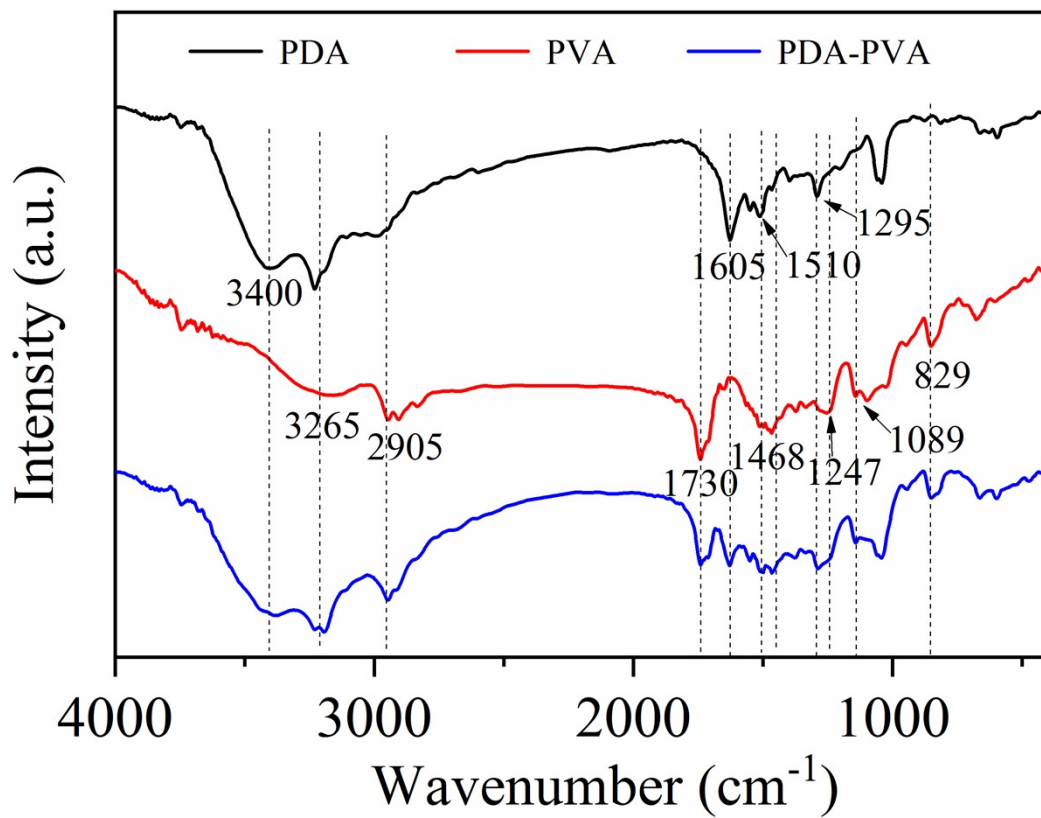

**Fig. S2.** FTIR spectrum of PDA, PVA and PDA-PVA.

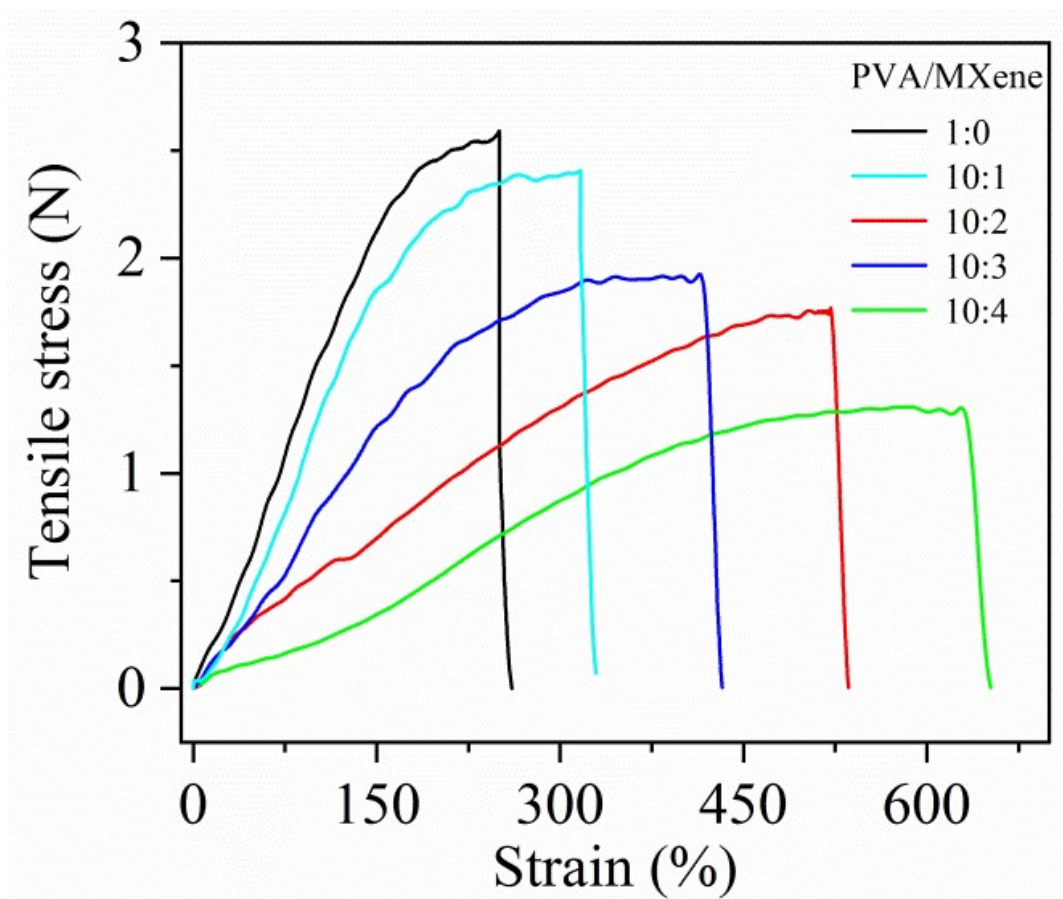

**Fig. S3.** Tensile fracture curves of hydrogels with different MXene contents.

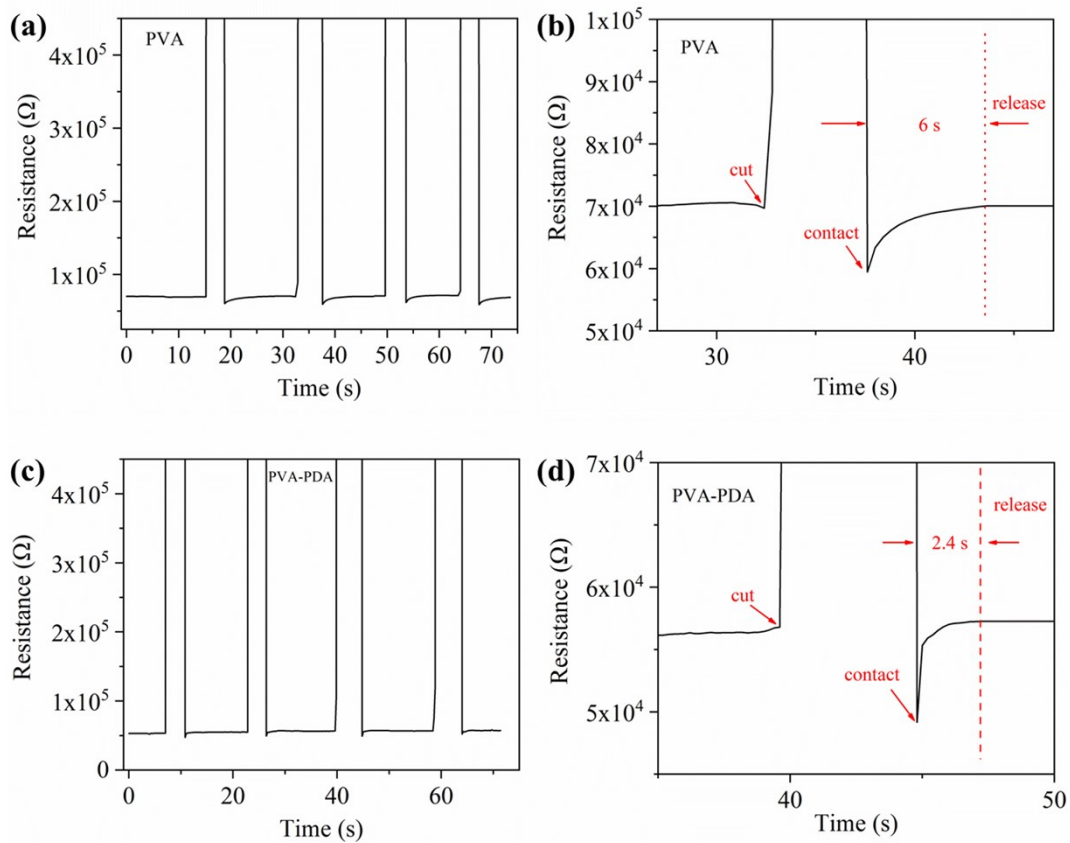

**Fig. S4.** (a) Cut healing cycle of PVA hydrogel at the same location and (b) amplification of the self-healing process. (c) Cut healing cycle of PVA-PDA hydrogel at the same location and (d) amplification of the self-healing process.

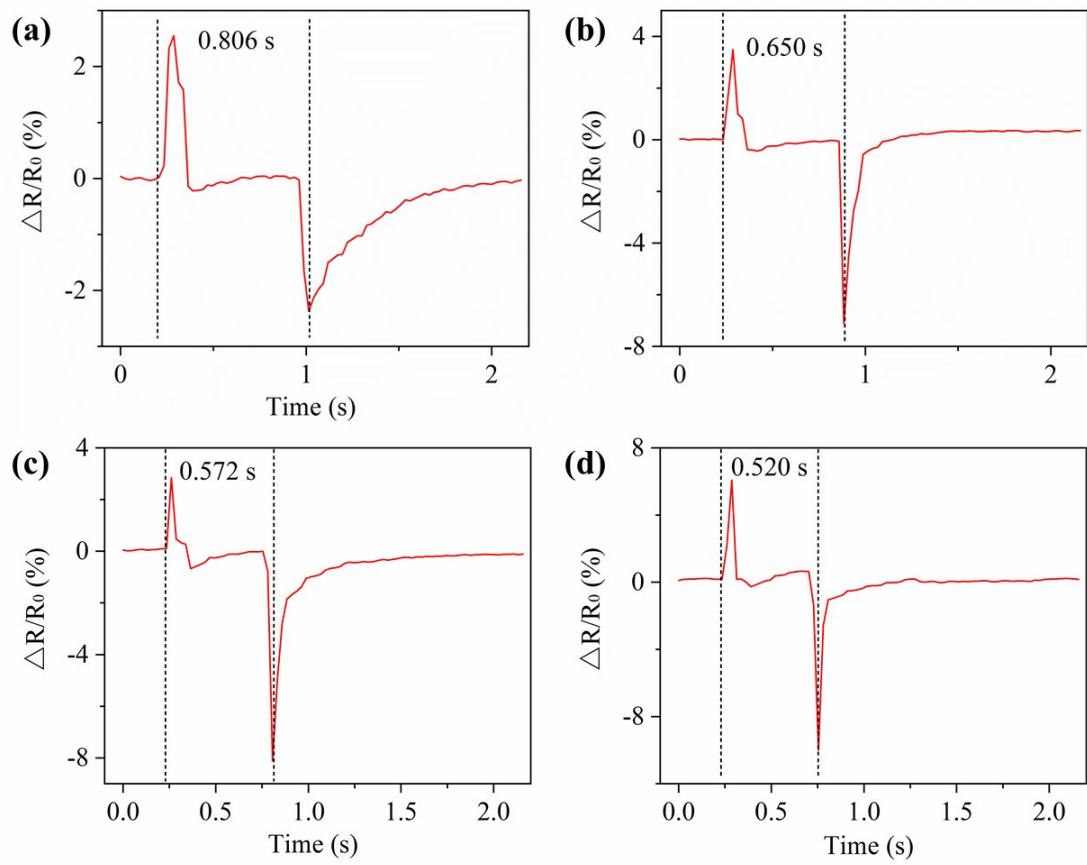

**Fig. S5.** (a), (b), (c), (d) four different positions of the sphere through the hydrogel at different times.

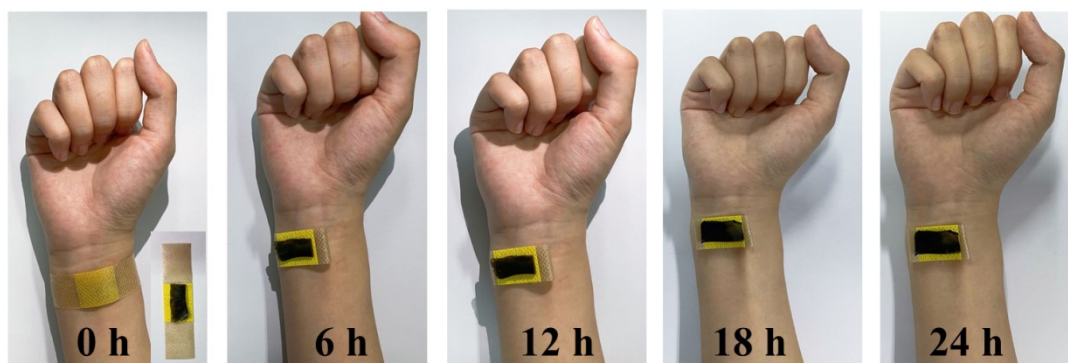

**Fig. S6.** The hydrogel sensor was attached to the skin for 24 h to test its biocompatibility.

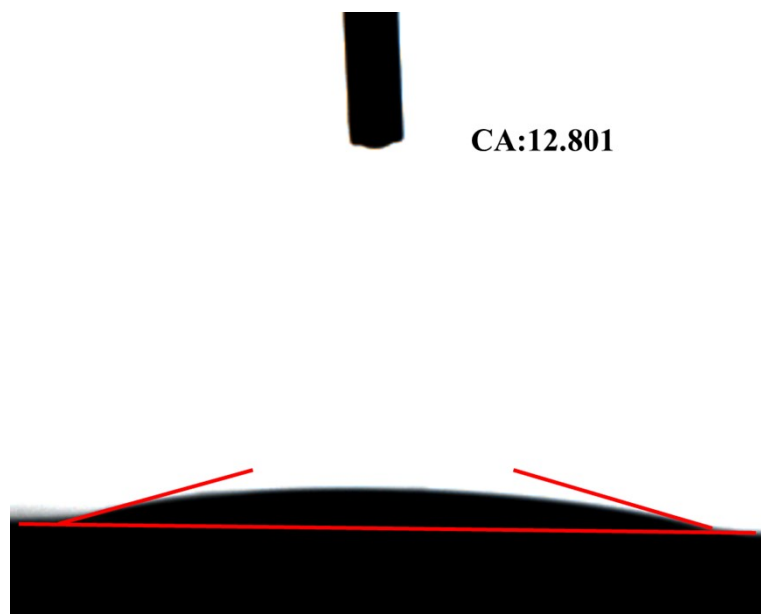

**Fig. S7.** Water contact angle test of PVA-MXene-PEDOT:PSS-PDA hydrogel.



**Table 1.** Properties comparison with previous studies.

| Materials                     | Working range (%) | Gauge factor                                                | Self-healing | Refs       |
|-------------------------------|-------------------|-------------------------------------------------------------|--------------|------------|
| PVA/Gly/CB/CNT                | 643.2             | 2.01                                                        | √            | [1]        |
| HPC/PVA                       | 975               | 0.984                                                       | ×            | [2]        |
| PAA/PVA/Fe <sup>3+</sup> /CNT | 550               | 1.61                                                        | √            | [3]        |
| PSBMA/PVA                     | 300               | 1.5                                                         | ×            | [4]        |
| Poly $\alpha$ -lipoic acid    | 300               | 1.46 (0–50%),<br>2.30 (50–<br>150%),<br>3.69 (150–<br>300%) | √            | [5]        |
| PDA/talc/PAM-KCl              | 50-1000%          | 0.69                                                        | √            | [6]        |
| PAM/PDMS/LiCl                 | 40                | 0.84                                                        | ×            | [7]        |
| PAA-rGO                       | 500               | 1.32                                                        | √            | [8]        |
| PEDOT:PSS/Acrylic acid /PAAc  | >100%             | ~1.1 at 100%                                                | ×            | [9]        |
| PVA-MXene-PEDOT:PSS-PDA       | 700               | 2.55                                                        | √            | This paper |

## References

- [1] J.F. Gu, J.R. Huang, G.Q. Chen, L.X. Hou, J. Zhang, X. Zhang, X.X. Yang, L.H. Guan, X.C. Jiang and H.Y. Liu, Multifunctional poly(vinyl alcohol) nanocomposite organohydrogel for flexible strain and temperature Sensor, *ACS Appl. Mater. Interfaces*, 2020, **12**, 40815-40827.
- [2] Y. Zhou, C. Wan, Y. Yang, H. Yang, S. Wang, Z. Dai, K. Ji, H. Jiang, X. Chen and Y. Long, Highly stretchable, elastic, and ionic conductive hydrogel for artificial soft electronics, *Adv. Funct. Mater.*, 2019, **29**, 1806220.
- [3] G. Ge, W. Yuan, W. Zhao, Y. Lu, Y.Z. Zhang, W.J. Wang, P. Chen, W. Huang, W.L. Si and X.C. Dong, Highly stretchable and autonomously healable epidermal sensor based on multi-functional hydrogel frameworks, *J. Mater. Chem. A*, 2019, **7**, 5949-5956.
- [4] Z. Wang, J. Chen, L. Wang, G. Gao, Y. Zhou, R. Wang, T. Xu, J. Yin and J. Fu, Flexible and wearable strain sensors based on tough and self-adhesive ion conducting hydrogels, *J. Mater. Chem. B*, 2019, **7**, 24-29.
- [5] C. Dang, M. Wang, J. Yu, Y. Chen, S. Zhou, X. Feng, D. Liu and H. Qi, Transparent, highly stretchable, rehealable, sensing, and fully recyclable ionic conductors fabricated by one-step polymerization based on a small biological molecule, *Adv. Funct. Mater.*, 2019, **29**, 1902467.
- [6] X. Jing, H.Y. Mi, Y.J. Lin, E. Enriquez, X.F. Peng and L.S. Turng, Highly stretchable and biocompatible strain sensors based on mussel-inspired super-adhesive self-healing hydrogels for human motion monitoring, *ACS Appl. Mater. Interfaces.*, 2018, **10**, 20897-20909.

- [7] K. Tian, J. Bae, S.E. Bakarich, C. Yang, R.D. Gately, G.M. Spinks, M.I.H. Panhuis, Z. Suo and J.J. Vlassak, 3D printing of transparent and conductive heterogeneous hydrogel–elastomer systems, *Adv. Mater.*, 2017, **29**, 1604827.
- [8] X. Jing, H.Y. Mi, X.F. Peng and L.S. Turng, Biocompatible, self-healing, highly stretchable polyacrylic acid/reduced graphene oxide nanocomposite hydrogel sensors via mussel-inspired chemistry, *Carbon N. Y.*, 2018, **136**, 63-72.
- [9] V.R. Feig, H. Tran, M. Lee and Z. Bao, Mechanically tunable conductive interpenetrating network hydrogels that mimic the elastic moduli of biological tissue, *Nat. Commun.*, 2018, **9**, 1-9.
